# Supplementary material for: Hypoxia Is Associated with Increased Immune Infiltrates and Both Anti-Tumour and Immune Suppressive Signalling in Muscle-Invasive Bladder Cancer
Source: MDPI journal article supplement (doi:10.3390/ijms24108956), 2023-05-18
Supplement: s1 [file s1]

**Supplementary Table S1.** Details of the antibodies used for ChIPseq experiments.

| Target         | Raised in | Concentration | Supplier          | Code      |
|----------------|-----------|---------------|-------------------|-----------|
| HIF-1 $\alpha$ | Rabbit    | 1mg/mL        | Abcam             | Ab2185    |
| HIF-2 $\alpha$ | Rabbit    | 1mg/mL        | Abcam             | Ab199     |
| HIF-1 $\beta$  | Mouse     | 1mg/mL        | Novus Biologicals | H1beta234 |
| CTCF           | Rabbit    | 1mg/mL        | Diagenode         | C01010170 |
| IgG control    | Rabbit    | 1mg/mL        | Millipore         | 12-370    |

**Supplementary Table S2.** Number of peaks according to different filtering parameters for each sample.

| Oxygen | Sample         | AllSigPeaks | Protein Coding | Near TSS | Protein Coding and near TSS |
|--------|----------------|-------------|----------------|----------|-----------------------------|
| 0.1%   | HIF-1 $\alpha$ | 30486       | 23536          | 7514     | 6801                        |
|        | HIF-1 $\beta$  | 4857        | 3539           | 975      | 848                         |
|        | HIF-2 $\alpha$ | 72520       | 48438          | 3435     | 2883                        |
| 1%     | HIF-1 $\alpha$ | 32123       | 24728          | 6712     | 6043                        |
|        | HIF-1 $\beta$  | 5963        | 4291           | 990      | 847                         |
|        | HIF-2 $\alpha$ | 36505       | 24713          | 1974     | 1612                        |

**Supplementary Table S3.** GO terms filtered by the search term “immun” significantly enriched under 1% hypoxia.

| Term                                                                                         | ID         | Ont | N   | DE | P.DE   |
|----------------------------------------------------------------------------------------------|------------|-----|-----|----|--------|
| somatic diversification of immune receptors via germline recombination within a single locus | GO:0002562 | BP  | 66  | 7  | 0.05   |
| neutrophil mediated immunity                                                                 | GO:0002446 | BP  | 501 | 43 | <0.001 |
| neutrophil activation involved in immune response                                            | GO:0002283 | BP  | 490 | 42 | <0.001 |
| myeloid leukocyte mediated immunity                                                          | GO:0002444 | BP  | 555 | 46 | <0.001 |
| myeloid cell activation involved in immune response                                          | GO:0002275 | BP  | 549 | 43 | 0.003  |
| leukocyte activation involved in immune response                                             | GO:0002366 | BP  | 716 | 51 | 0.01   |
| cell activation involved in immune response                                                  | GO:0002263 | BP  | 720 | 51 | 0.01   |

Ont is the gene ontology term, BP = biological process. N = number of genes in the GO term. DE = number of differentially expressed genes from dataset present in the GO term. P.DE = p value for over representation of the GO term in the set.

**Supplementary Table S4.** GO terms filtered by the search term “immun” significantly enriched under 0.2% hypoxia.

| Term                                                                                         | ID         | Ont | N   | DE  | P.DE  |
|----------------------------------------------------------------------------------------------|------------|-----|-----|-----|-------|
| somatic recombination of immunoglobulin genes involved in immune response                    | GO:0002204 | BP  | 51  | 15  | 0.01  |
| somatic diversification of immunoglobulins involved in immune response                       | GO:0002208 | BP  | 51  | 15  | 0.01  |
| somatic recombination of immunoglobulin gene segments                                        | GO:0016447 | BP  | 56  | 15  | 0.02  |
| immunoglobulin production involved in immunoglobulin-mediated immune response                | GO:0002381 | BP  | 61  | 15  | 0.05  |
| somatic diversification of immune receptors via germline recombination within a single locus | GO:0002562 | BP  | 66  | 16  | 0.05  |
| somatic diversification of immunoglobulins                                                   | GO:0016445 | BP  | 66  | 16  | 0.05  |
| neutrophil mediated immunity                                                                 | GO:0002446 | BP  | 501 | 100 | 0.006 |
| neutrophil activation involved in immune response                                            | GO:0002283 | BP  | 490 | 95  | 0.02  |
| myeloid leukocyte mediated immunity                                                          | GO:0002444 | BP  | 555 | 105 | 0.02  |

Ont is the gene ontology term, BP = biological process. N = number of genes in the GO term. DE = number of differentially expressed genes from dataset present in the GO term. P.DE = p value for over representation of the GO term in the set.

A

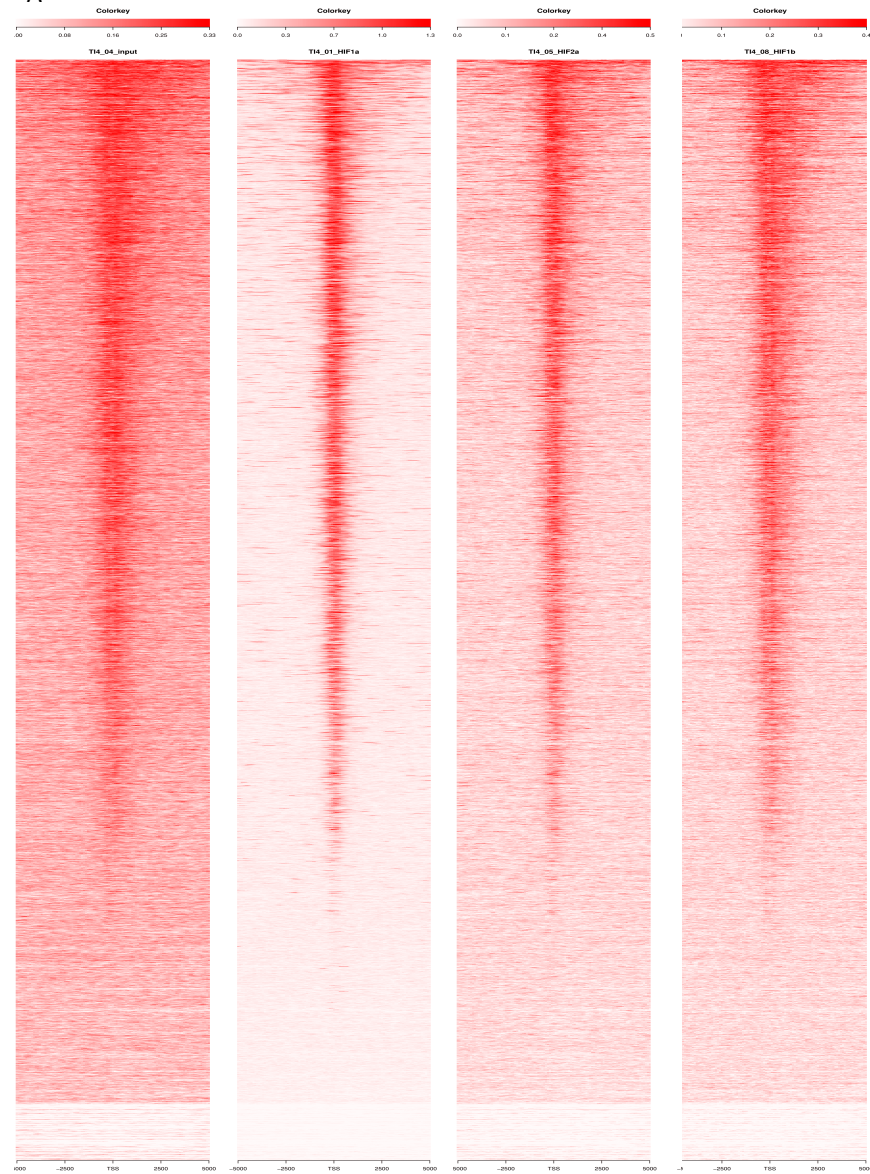

B

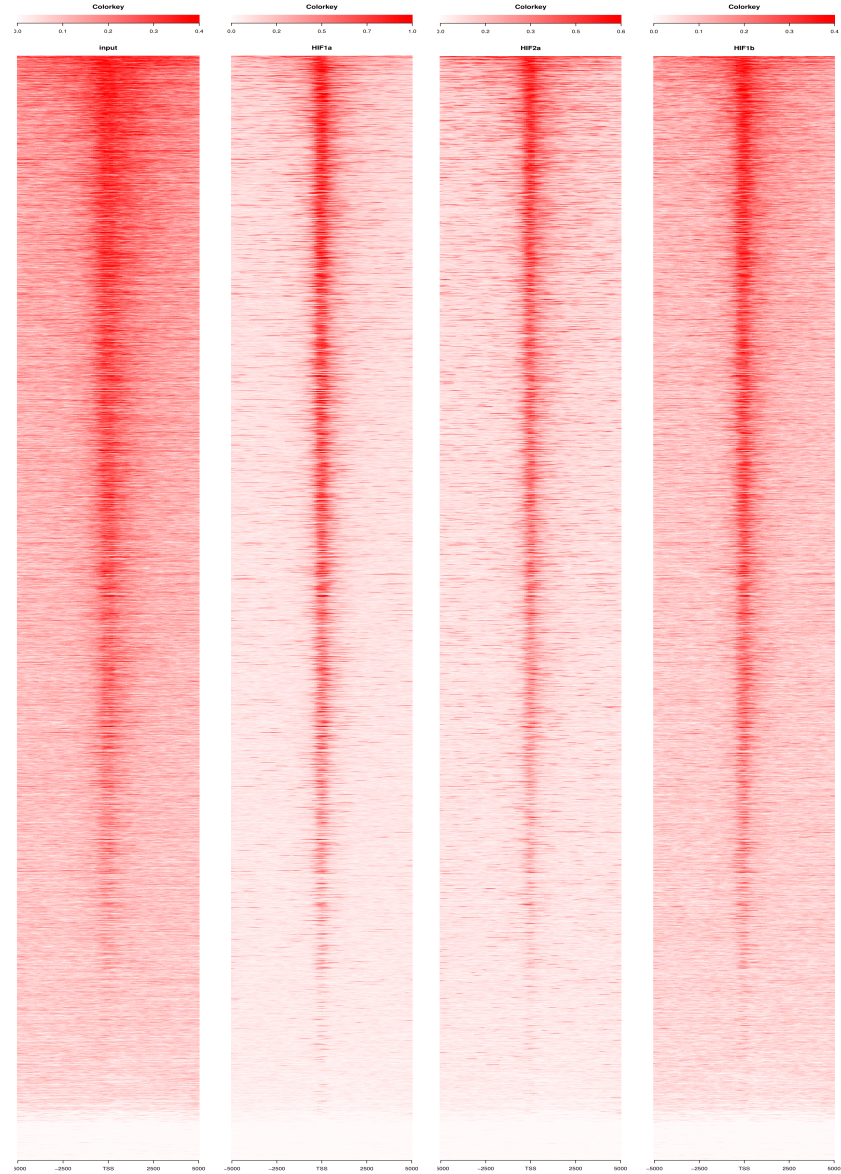

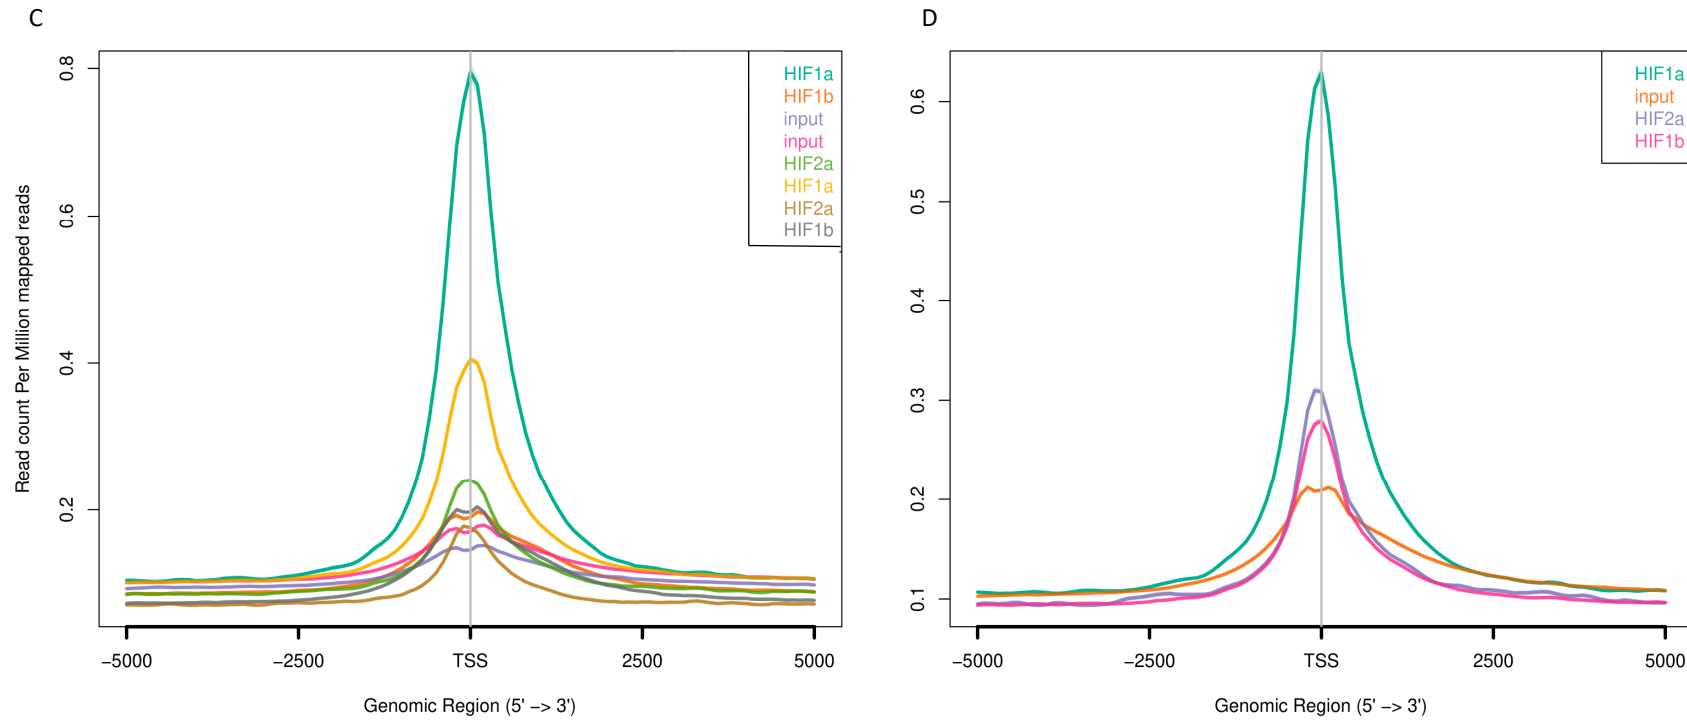

**Supplementary Figure S1.** Heatmaps of signal intensities for T24 cells cultured under **A)** 1% O<sub>2</sub> and **B)** 0.1% O<sub>2</sub> and enrichment of mapped reads around the transcriptional start site for each sample under **C)** 1% O<sub>2</sub> and **D)** 0.1% O<sub>2</sub>.

Binding sites for each sample were identified by MACS peak caller and ordered on the y-axis according to signal intensity. Heatmaps show the signal (read counts per million mapped reads) expressed as colour intensity (darker colour = higher signal). The x-axis shows genomic region of mapped reads at the transcriptional start sites and across flanking  $\pm 5$ kb regions. Graphs were generated using R package “ngsplot”. Left to right: input DNA, HIF-1 $\alpha$ , HIF-2 $\alpha$  and HIF-1 $\beta$  ChIP. The signal reads are expressed as counts per million mapped reads (y-axis) across flanking  $\pm 5$ kb regions (x-axis). Graphs were generated using package “nglplots”. 1% O<sub>2</sub> data were generated in duplicate, 0.1% O<sub>2</sub> data were single replicates.

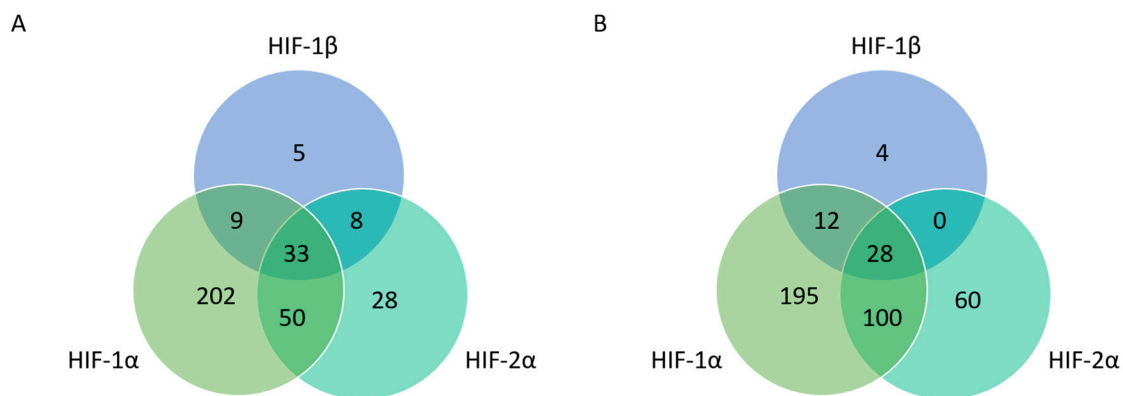

**Supplementary Figure S2.** Venn diagrams showing the number of immune response genes overlapping between the HIF subunits for **A)** 1% oxygen and **B)** 0.1% oxygen. The most lenient filtering parameter, all significant peaks, for each sample under both oxygen concentrations was used. Immune response genes were defined using those annotated as “immune response” from the EBI QuickGO resource.



A

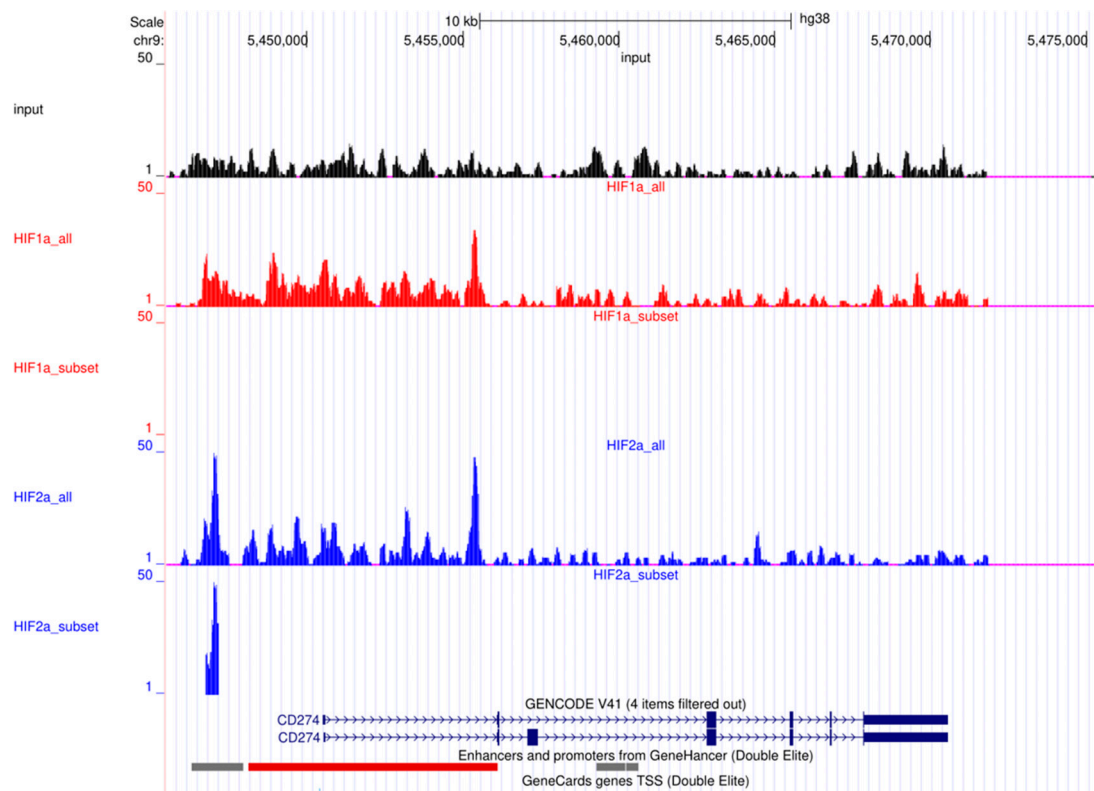

B

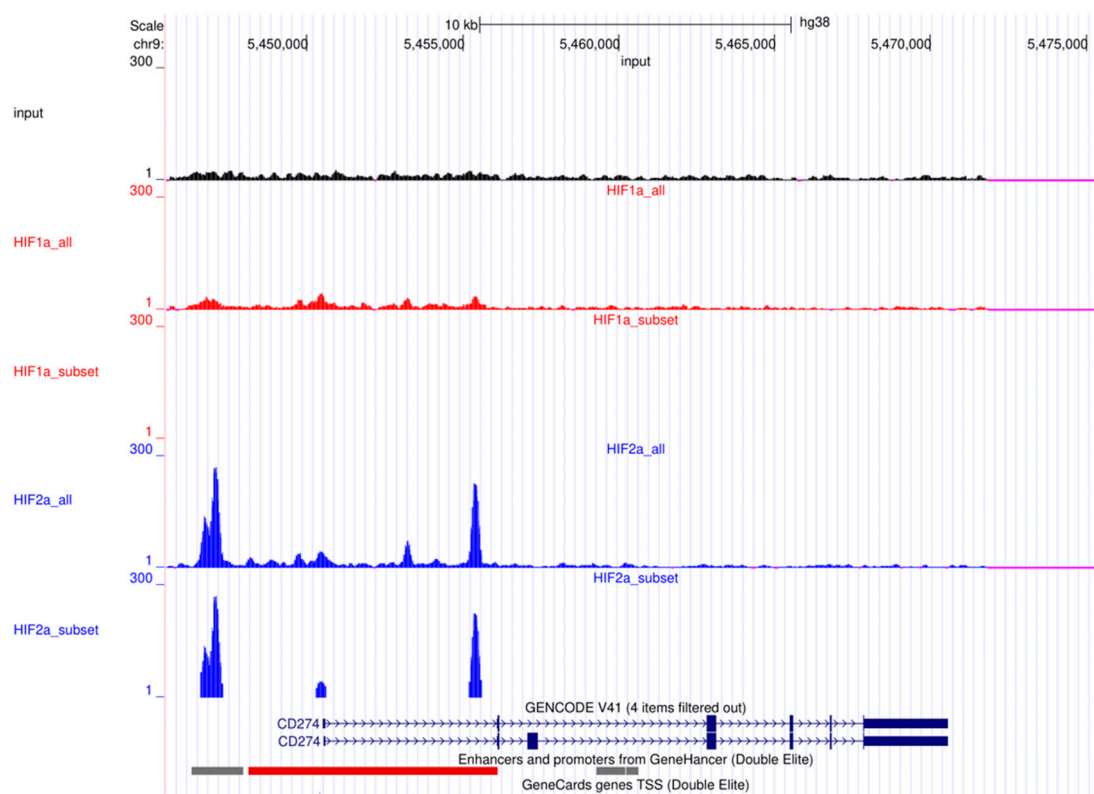

**Supplementary Figure S3.** ChIPseq tracks for the CD274 gene (encoding the PD-L1 protein) shown using the UCSC genome browser for **A)** 1% and **B)** 0.1% samples.

Representative tracks are displayed from top to bottom in each image for input: HIF-1 $\alpha$  (no filtering), HIF-1 $\alpha$  (filtering), HIF-2 $\alpha$  (no filtering), and HIF-2 $\alpha$  (filtering). The track shown at the bottom annotates known enhancers and promoters from the GeneHancer database where: grey = enhancer and red = enhancer/promoter. The corresponding peaks above the CD274 enhancer region for the HIF-2 $\alpha$  tracks demonstrate the enrichment of HIF-2 $\alpha$  in this genomic region in T24 cell line.

(A) HIF-1 $\alpha$

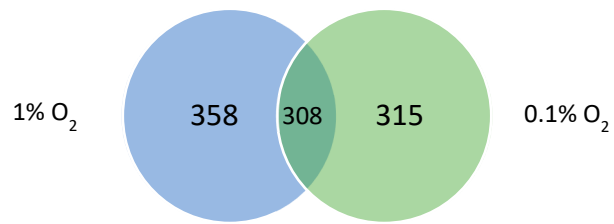

(B) HIF-2 $\alpha$

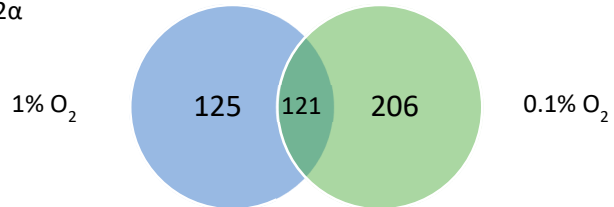

**Supplementary Figure S4.** Venn diagrams showing the number of unique immune response genes overlapping between different oxygen concentrations for **A)** HIF-1 $\alpha$  and **B)** HIF-2 $\alpha$ .

Genes unique to each subunit are shown using the most lenient filtering parameter, all significant peaks, for each sample under both oxygen concentrations. Immune response genes were defined using those annotated as “immune response” from the EBI QuickGO resource.

A

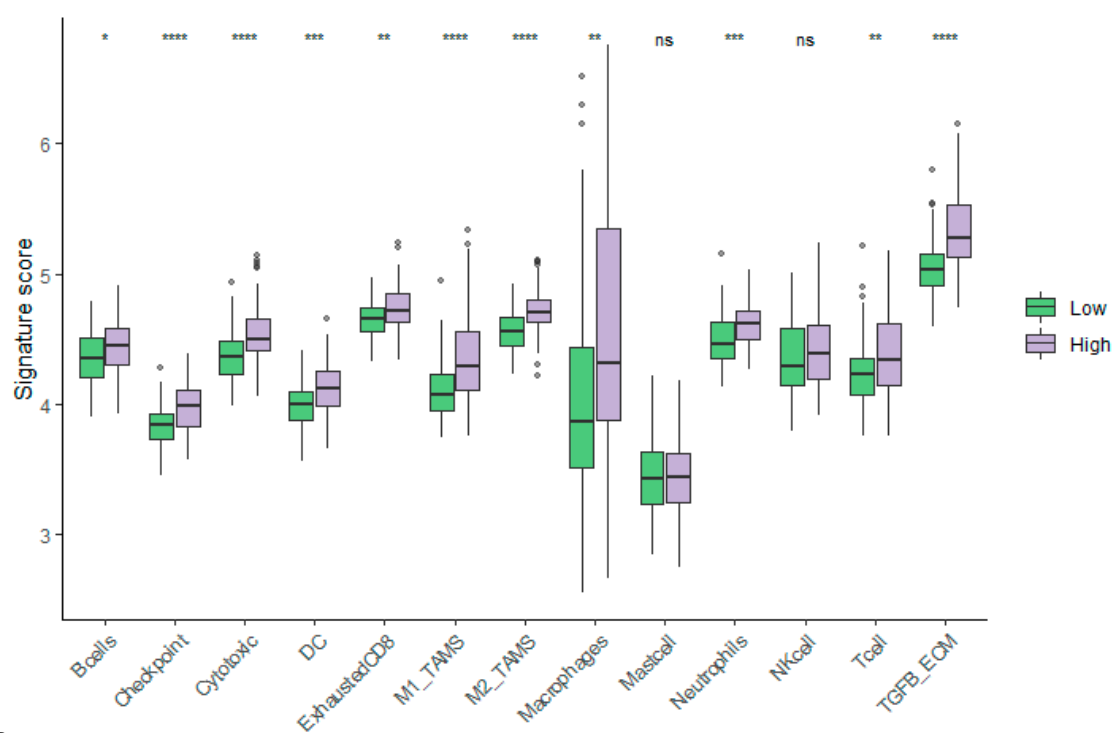

B

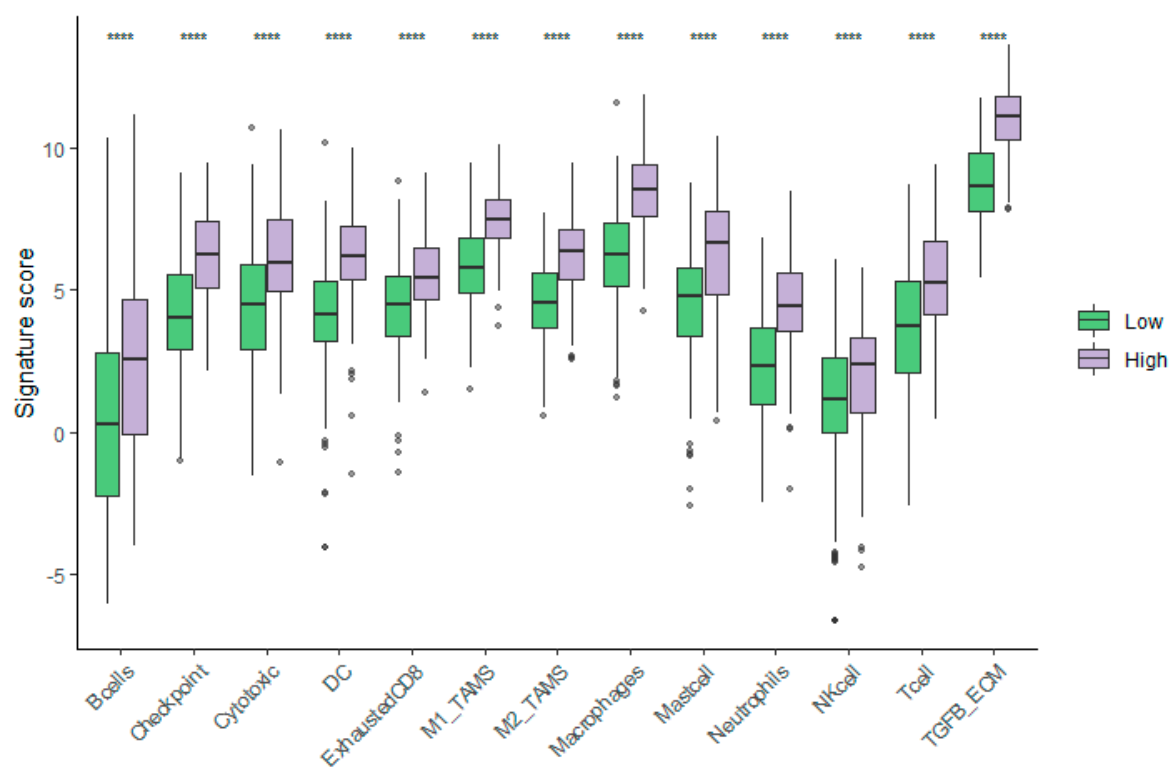

**Supplementary Figure S5.** Boxplots showing the score of immune-related signatures according to hypoxia score for **A)** BCON and **B)** TCGA. Signature scores were calculated using the mean expression of the genes in the signature. Hypoxia status was stratified by the median hypoxia score of the cohort. Statistics are p values from t tests with p values represented as: ns = not significant, \* $<0.05$ , \*\* $<0.01$ , \*\*\* $<0.001$ , \*\*\*\* $<0.0001$ .
